# Supplementary material for: Jellyfish extract induces apoptotic cell death through the p38 pathway and cell cycle arrest in chronic myelogenous leukemia K562 cells
Source: PeerJ. 2017 Jan 19;5:e2895. doi: 10.7717/peerj.2895 (PMC5251936; doi:10.7717/peerj.2895)
Supplement: Data S3 [file peerj-05-2895-s003.xlsx]

## Sheet: p-p38, p38
	p38
1	19153.4	19.058				pp38/p38			0	10	20	30	40
2	17725.7	17.638				0.468202		pp38/p38	0.468202	0.63023	0.415576	0.843355	2.52758
3	21278.6	21.173				0.63023
4	21076	20.971				0.415576
5	21262.6	21.157				0.843355
						2.52758
	pp38
1	4212.63	8.923
2	5248.39	11.116
3	4154.47	8.799
4	8350.05	17.686
5	25247.5	53.476
	p38
1	31521.6	22.027
2	24813.6	17.339
3	22886.1	15.992
4	29671.3	20.734				pp38/p38				0	10	20	30	40
5	34214.7	23.908				0.484088			pp38/p38	0.484088	0.610704	0.432966	0.980901	2.15351
						0.610704
	pp38					0.432966
1	6094.3	10.663				0.980901
2	6052.23	10.589				2.15351
3	3957.45	6.924
4	11624.2	20.338
5	29426.4	51.486
	pp38/p38	0.468202	0.63023	0.415576	0.843355	2.52758
	pp38/p38	0.484088	0.610704	0.432966	0.980901	2.15351
		0	10	20	30	40
	average	0.476145	0.620467	0.424271	0.912128	2.34054
		0.468202	0.63023	0.415576	0.843355	2.52758
		0.484088	0.610704	0.432966	0.980901	2.15351
	표준편차	0.0112327	0.013807	0.0122966	0.0972596	0.264511
	표준오차	0.00794269	0.009763	0.00869502	0.0687729	0.187037

## Sheet: pERK, ERK
	erk
1	13846.3	22.32				perk/erk			0	10	20	30	40
2	14578.4	23.5				0.420609		perk/erk	0.420609	0.579489	0.995128	1.48243	1.77069
3	10695.8	17.241				0.579489
4	11988.4	19.325				0.995128
5	10926.6	17.614				1.48243
						1.77069
	perk
1	9523.52	9.388
2	13815.6	13.618
3	17405	17.157
4	29063	28.648
5	31640.3	31.189
	erk
2	38865.4	19.939
3	44124.2	22.637
4	34626.6	17.764
5	41502.7	21.292				perk/erk				0	10	20	30	40
6	35796.2	18.365				0.420382			perk/erk	0.420382	0.547467	0.912857	1.28936	1.93607
						0.547467
	perk					0.912857
1	6414.9	8.382				1.28936
2	9484.58	12.393				1.93607
3	12410.9	16.216
4	21010.7	27.453
5	27212.1	35.556
	perk/erk	0.420609	0.579489	0.995128	1.48243	1.77069
	perk/erk	0.420382	0.547467	0.912857	1.28936	1.93607
		0	10	20	30	40
	average	0.420496	0.563478	0.953993	1.38589	1.85338
		0.420609	0.579489	0.995128	1.48243	1.77069
		0.420382	0.547467	0.912857	1.28936	1.93607
	표준편차	0.000160622	0.0226436	0.058174	0.136524	0.116942
	표준오차	0.000113577	0.0160114	0.0411352	0.0965373	0.0826901

## Sheet: p-JNK, JNK
	jnk
1	24994.9	20.075				pjnk/jnk			0	10	20	30	40
2	26612.2	21.374				0.0676463		pjnk/jnk	0.0676463	0.206559	1.27355	1.49238	1.98119
3	23749.1	19.075				0.206559
4	21081.9	16.932				1.27355
5	28068.9	22.544				1.49238
						1.98119
	pjnk
1	702.77	1.358
2	2284.15	4.415
3	12567.8	24.293
4	13072.7	25.269
5	23106.4	44.664
	jnk
1	13568.4	13.464
2	23337.9	23.158
3	20197	20.041
4	24336.1	24.148				pjnk/jnk				0	10	20	30	40
5	19337.9	19.189				0.101976			pjnk/jnk	0.101976	0.215044	0.961329	1.12767	2.45714
						0.215044
	pjnk					0.961329				0.101976
1	672.477	1.373				1.12767				0.215044
2	2439.15	4.98				2.45714				0.961329
3	9436.59	19.266								1.12767
4	13337.6	27.231								2.45714
5	23094.4	47.15
	pjnk/jnk	0.0676463	0.206559	1.27355	1.49238	1.98119
	pjnk/jnk	0.101976	0.215044	0.961329	1.12767	2.45714
		0	10	20	30	40
	average	0.084811	0.210802	1.11744	1.31003	2.21916
		0.0676463	0.206559	1.27355	1.49238	1.98119
		0.101976	0.215044	0.961329	1.12767	2.45714
	표준편차	0.0242745	0.00599988	0.220775	0.257889	0.336544
	표준오차	0.0171647	0.00424255	0.156111	0.182355	0.237972
