# Supplementary material for: Jellyfish extract induces apoptotic cell death through the p38 pathway and cell cycle arrest in chronic myelogenous leukemia K562 cells
Source: PeerJ. 2017 Jan 19;5:e2895. doi: 10.7717/peerj.2895 (PMC5251936; doi:10.7717/peerj.2895)
Supplement: Data S4 [file peerj-05-2895-s004.xlsx]

## Sheet: cdk4
	cdk4
1	8035.49	15.2859				CDK4/bactin			0	10	20	30	40
2	17509.4	33.3082				0.753576		CDK4/bactin	0.753576	1.77722	1.2769	0.679877	0.496377
3	15210.5	28.935				1.77722
4	6725.25	12.7934				1.2769		0.753576
5	5087.2	9.67738				0.679877		1.77722
	52567.9					0.496377		1.2769
								0.679877
	beta actin							0.496377
1	21987	20.2845
2	20314.7	18.7418
3	24562.2	22.6604
4	20396.6	18.8173
5	21132.3	19.4961
	108393
	cdk4
1	7367.59	20.2077
2	11737.9	32.1946
3	9874.47	27.0836
4	4581.4	12.5658				CDK4/bactin				0	10	20	30	40
5	2897.89	7.9483				0.797411			CDK4/bactin	0.797411	1.89449	1.29288	0.782077	0.384923
	36459.3					1.89449
	beta actin					1.29288
1	24909.7	25.3417				0.782077		0.797411
2	16704.2	16.9939				0.384923		1.89449
3	20591.2	20.9482						1.29288
4	15793.3	16.0672						0.782077
5	20297.1	20.6491						0.384923
	98295.6
	CDK4/bactin	0.753576	1.77722	1.2769	0.679877	0.496377
	cyclinD/bactin	0.797411	1.89449	1.29288	0.782077	0.384923
		0	10	20	30	40
	average	0.775494	1.83585	1.28489	0.730977	0.44065
		0.753576	1.77722	1.2769	0.679877	0.496377
		0.797411	1.89449	1.29288	0.782077	0.384923
	표준편차	0.0309964	0.08292	0.0112994	0.072267	0.0788097
	표준오차	0.0219178	0.0586333	0.00798988	0.0511005	0.0557269

## Sheet: cyclinD1
	cyclinD
1	12313.6	22.4499				cyclinA/beta actin			0	10	20	30	40
2	16527.6	30.1327				1.10675		cyclinD/bactin	1.10675	1.60778	1.38398	0.602593	0.241929
3	17201.6	31.3615				1.60778
4	6219.46	11.3392				1.38398		1.10675
5	2587.05	4.71666				0.602593		1.60778
	54849.3					0.241929		1.38398
								0.602593
	beta actin							0.241929
1	21987	20.2845
2	20314.7	18.7418
3	24562.2	22.6604
4	20396.6	18.8173
5	21132.3	19.4961
	108393
	cyclinD
1	12793.8	26.8413
2	14386.1	30.1819
3	11863	24.8884
4	5245.9	11.0059				cyclinA/beta actin				0	10	20	30	40
5	3375.83	7.08248				1.05918			cyclinD/bactin	1.05918	1.77604	1.18809	0.684991	0.342993
	47664.6					1.77604
	beta actin					1.18809
1	24909.7	25.3417				0.684991		1.05918
2	16704.2	16.9939				0.342993		1.77604
3	20591.2	20.9482						1.18809
4	15793.3	16.0672						0.684991
5	20297.1	20.6491						0.342993
	98295.6
	cyclinD/bactin	1.10675	1.60778	1.38398	0.602593	0.241929
	cyclinD/bactin	1.05918	1.77604	1.18809	0.684991	0.342993
		0	10	20	30	40
	average	1.08297	1.69191	1.28604	0.643792	0.292461
		1.10675	1.60778	1.38398	0.602593	0.241929
		1.05918	1.77604	1.18809	0.684991	0.342993
	표준편차	0.0336398	0.118979	0.138514	0.0582638	0.0714628
	표준오차	0.0237869	0.0841308	0.0979444	0.0411987	0.0505318

## Sheet: cdk2
	cdk2
6	16593.2	26.4188				CDK2/bactin			0	10	20	30	40
7	16958.6	27.0006				1.30241		CDK2/bactin	1.30241	1.44067	1.06083	0.864948	0.32139
8	15098.3	24.0388				1.44067
9	10222.7	16.276				1.06083		1.30241
10	3935.46	6.26583				0.864948		1.44067
	62808.3					0.32139		1.06083
								0.864948
	beta actin							0.32139
1	21987	20.2845
2	20314.7	18.7418
3	24562.2	22.6604
4	20396.6	18.8173
5	21132.3	19.4961
	108393
	cdk2
1	24872.4	31.6588
2	26459.5	33.6789
3	16946.7	21.5705
4	7379.4	9.39284				CDK2/bactin				0	10	20	30	40
5	2906.05	3.69895				1.24928			CDK2/bactin	1.24928	1.98183	1.02971	0.584597	0.179134
	78564.1					1.98183
	beta actin					1.02971
1	24909.7	25.3417				0.584597		1.24928
2	16704.2	16.9939				0.179134		1.98183
3	20591.2	20.9482						1.02971
4	15793.3	16.0672						0.584597
5	20297.1	20.6491						0.179134
	98295.6
	CDK2/bactin	1.30241	1.44067	1.06083	0.864948	0.32139
	cyclinD/bactin	1.24928	1.98183	1.02971	0.584597	0.179134
		0	10	20	30	40
	average	1.27585	1.71125	1.04527	0.724773	0.250262
		1.30241	1.44067	1.06083	0.864948	0.32139
		1.24928	1.98183	1.02971	0.584597	0.179134
	표준편차	0.0375708	0.382658	0.0220061	0.198238	0.10059
	표준오차	0.0265666	0.27058	0.0155607	0.140175	0.0711279

## Sheet: cyclinA
	cyclinA
1	19302.6	29.0276				cyclinA/beta actin			0	10	20	30	40
2	10871.7	16.3491				1.43102		PARP/beta actin	1.43102	0.872334	1.29296	0.949074	0.382916
3	19483.1	29.299				0.872334
4	11875.8	17.859				1.29296		1.43102
5	4964.28	7.46536				0.949074		0.872334
	66497.5					0.382916		1.29296
								0.949074
	beta actin							0.382916
1	21987	20.2845
2	20314.7	18.7418
3	24562.2	22.6604
4	20396.6	18.8173
5	21132.3	19.4961
	108393
	cyclinA
1	24096.9	32.2275
2	14212.8	19.0084
3	21142.2	28.2759
4	12049.8	16.1156				cyclinA/beta actin				0	10	20	30	40
5	3269.38	4.37251				1.27172			PARP/beta actin	1.27172	1.11855	1.3498	1.00301	0.211753
	74771.1					1.11855
	beta actin					1.3498
1	24909.7	25.3417				1.00301		1.27172
2	16704.2	16.9939				0.211753		1.11855
3	20591.2	20.9482						1.3498
4	15793.3	16.0672						1.00301
5	20297.1	20.6491						0.211753
	98295.6
	cyclinA/bactin	1.43102	0.872334	1.29296	0.949074	0.382916
	cyclinA/bactin	1.27172	1.11855	1.3498	1.00301	0.211753
		0	10	20	30	40
	average	1.35137	0.99544	1.32138	0.976044	0.297335
		1.43102	0.872334	1.29296	0.949074	0.382916
		1.27172	1.11855	1.3498	1.00301	0.211753
	표준편차	0.112642	0.174098	0.0401913	0.0381412	0.12103
	표준오차	0.0796498	0.123106	0.0284196	0.0269699	0.0855815
