# Supplementary material for: Jellyfish extract induces apoptotic cell death through the p38 pathway and cell cycle arrest in chronic myelogenous leukemia K562 cells
Source: PubMed Central journal article supplement (PMC5251936; doi:10.7717/peerj.2895), 2017-01-19

## Supplementary Figure 2.

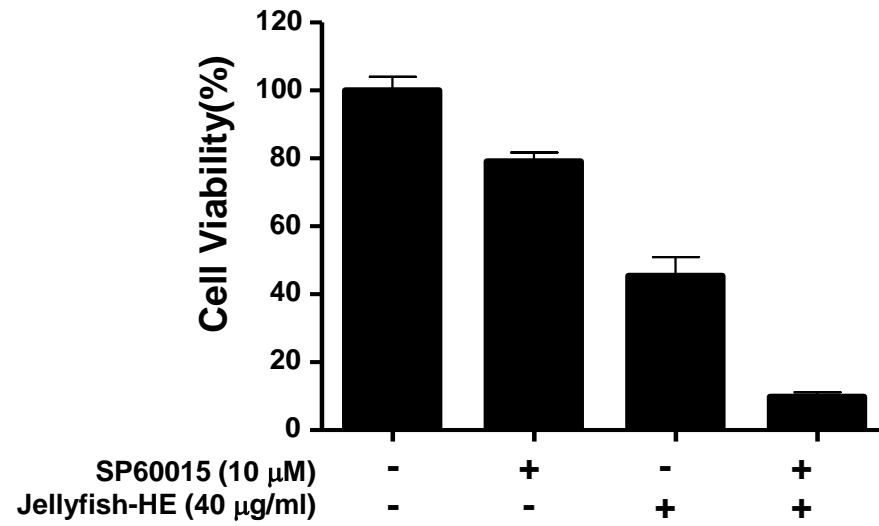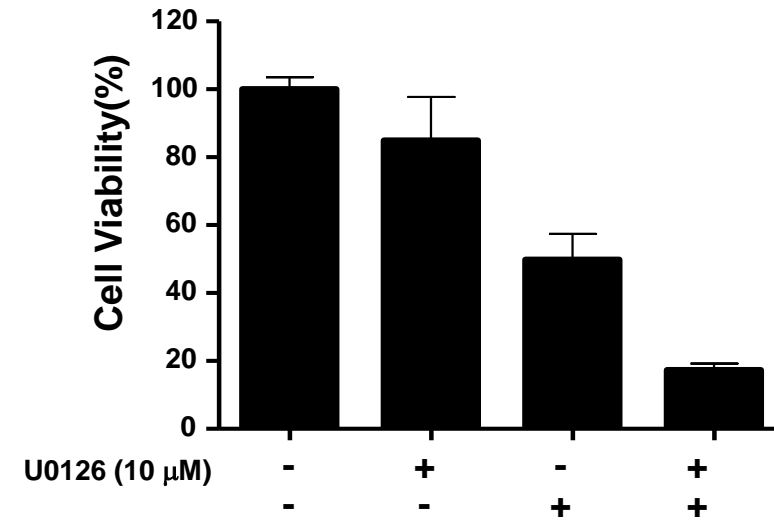

Supplement: peerj-05-2895-s006.pdf [file peerj-05-2895-s006.pdf]
